# Supplementary material for: A new strategy for electrochemical fabrication of manganese dioxide coatings based on silica nanoparticles deposited on titanium fibers for selective and highly efficient solid-phase microextraction
Source: Royal Society of Chemistry journal article supplement (doi:10.1039/c8nj06312e), 2019-01-01
Supplement: c8nj06312e1.pdf [file c8nj06312e1.pdf]

## A new strategy for electrochemical fabrication of manganese dioxide coatings based on silica nanoparticles deposited on titanium fibers for selective and highly efficient solid-phase microextraction

Ziyi Wang, Feifei Wang, Rong Zhang, Zuo Wang, Xinzhen Du\*

Journal: **New Journal of Chemistry**

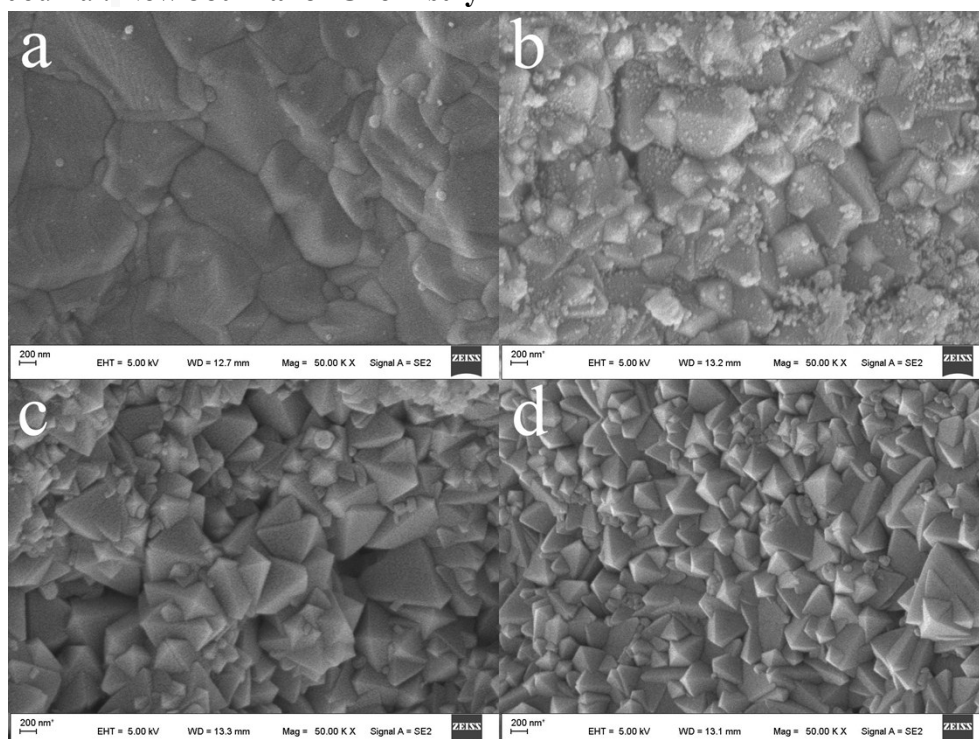

Fig. S1 SEM images of the TiO<sub>2</sub> coatings deposited on the anodized Ti wires at 25 V for 30 min (a), 60 min (b), 90 min (c) and 120 min (d).

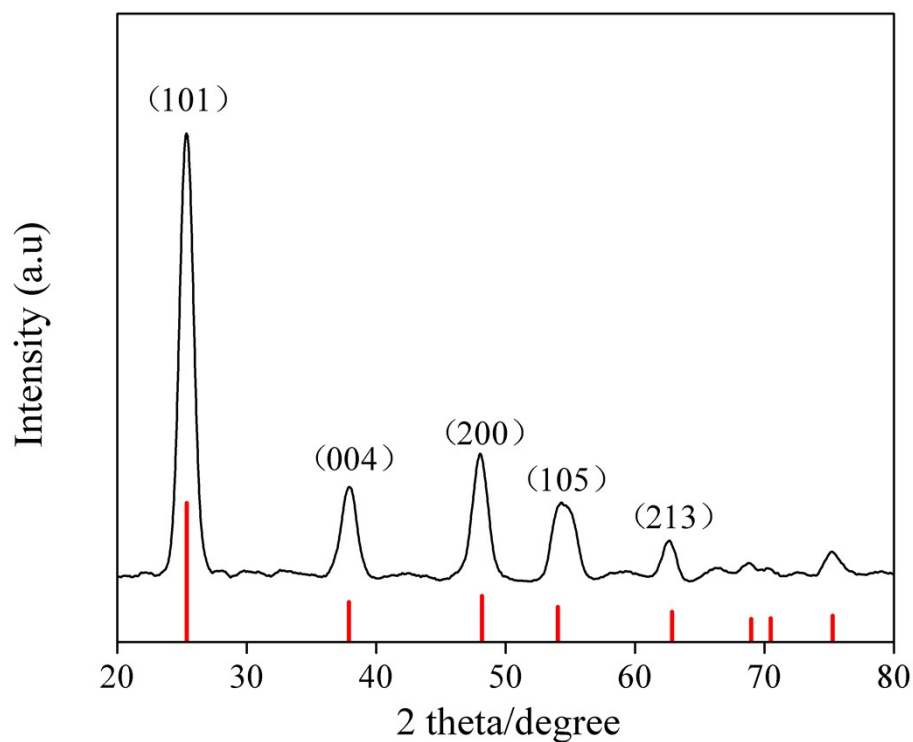

Fig. S2 XRD pattern of the TiO<sub>2</sub> pyramid coating.

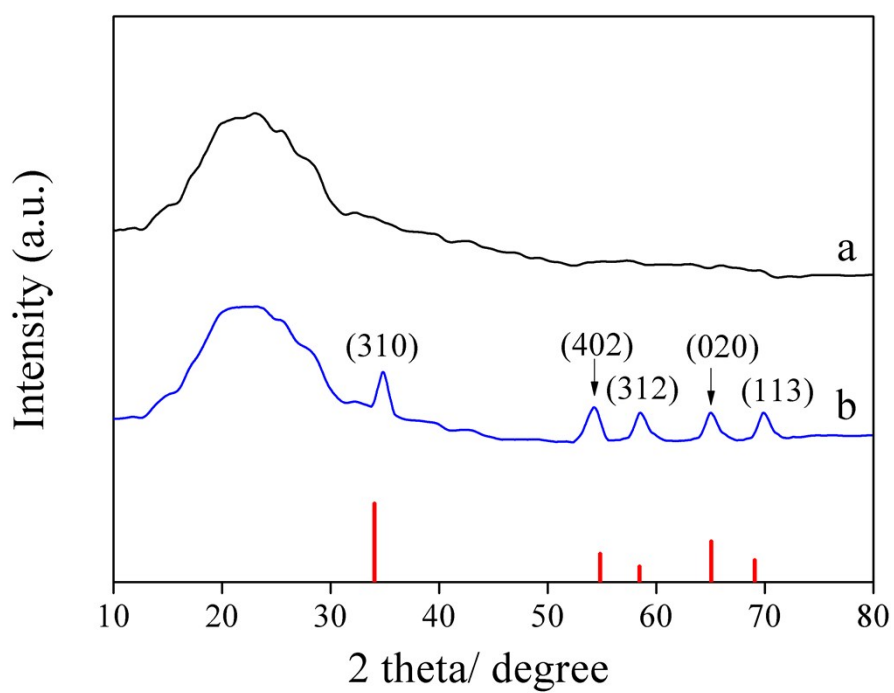

Fig. S3 XRD patterns of the PPy coating (a) and the MnO<sub>2</sub>/PPyNPs coating (b).

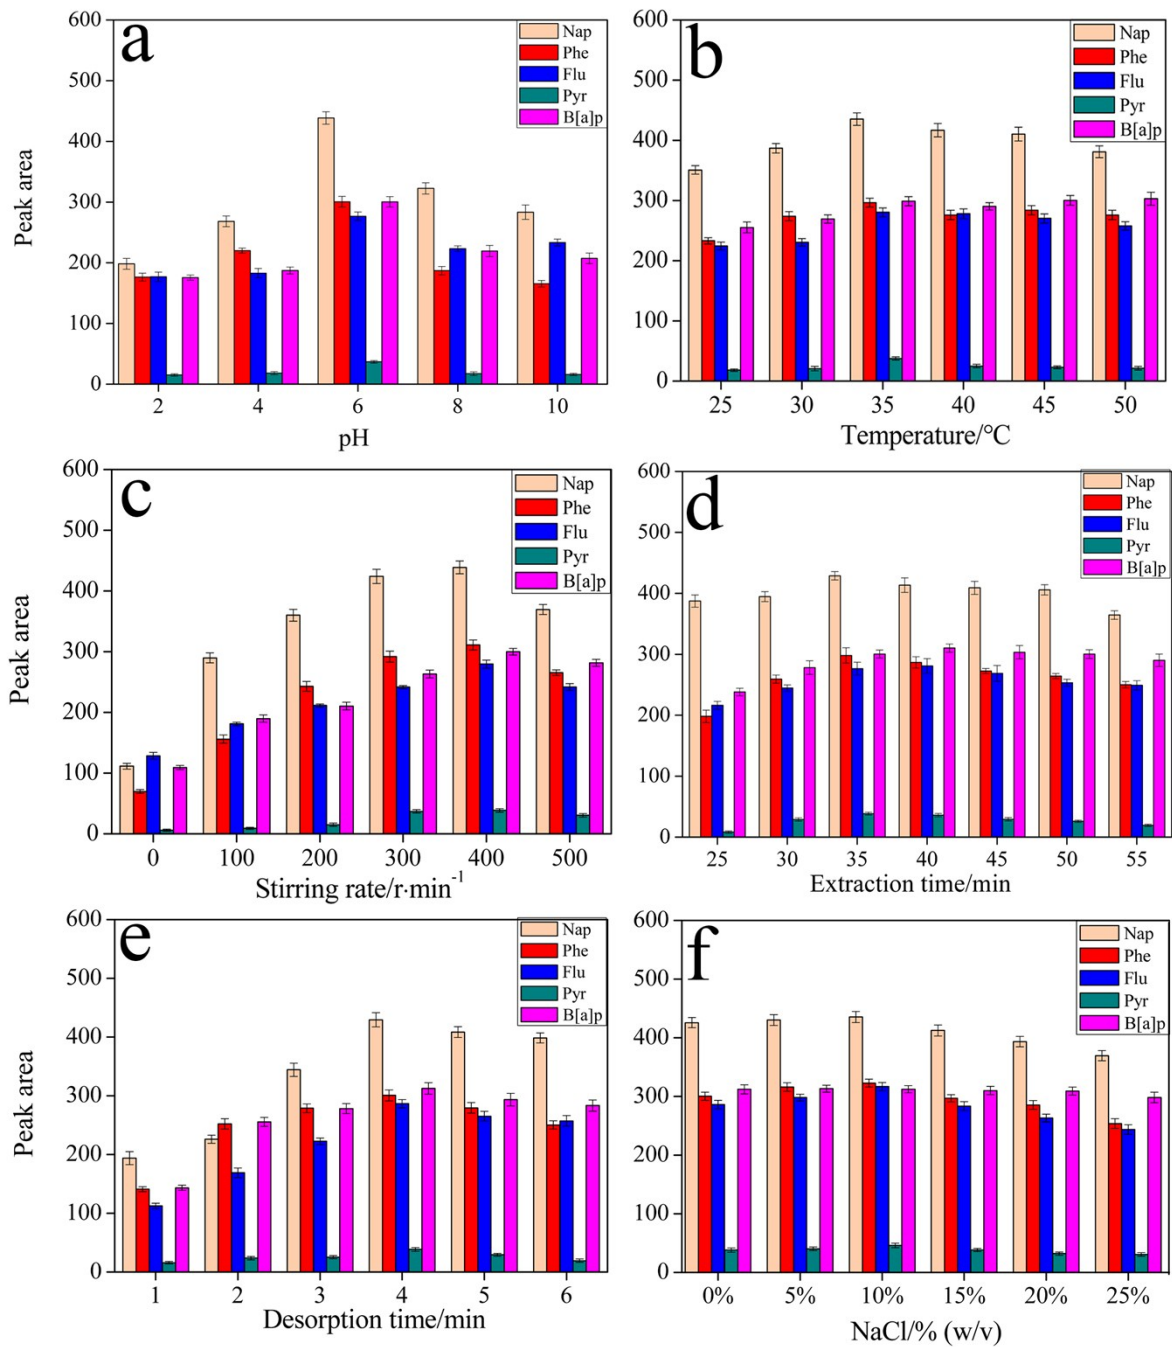

Fig. S4 Dependence of extraction efficiency on pH (a), temperature (b), stirring (c), extraction time (d), desorption time (e) and ionic strength (f).
